# Supplementary material
Source: ML conference proceedings conference paper supplement (https://openreview.net/forum?id=jLnuSsV9VM)
Supplement: supplementary_material [file attachment]

# Supplementary Material for Balancing Knowledge Updates: Toward Unified Modular Editing in LLMs

**Jiahao Liu**

*Jinan University*

LJIAHAO@STU2023.JNU.EDU.CN

**Zijian Wang**

*The University of Sydney*

ZWAN0998@UNI.SYDNEY.EDU.AU

**Kuo Zhao\***

**Dong Hu**

*Jinan University*

ZHAOKUO@JNU.EDU.CN

HUDONG@STU2023.JNU.EDU.CN

**Editors:** Hung-yi Lee and Tongliang Liu

## Appendix A. Causal Tracing Analysis on Mistral-7B

This supplement provides additional experimental evidence on Mistral-7B.

Figure 1 presents the heatmaps of causal influence from MLP and Attn layers on factual recall. Panel (a) demonstrates that the causal effect of the MLP module is concentrated in the middle layers, especially when interventions target the last subject token, confirming that MLP layers are primary repositories for factual knowledge. Panel (b) shows that the Attn module exerts its strongest influence in the earlier layers, particularly for the last subject token, with this effect diminishing rapidly in deeper layers.

These patterns in Mistral-7B are highly consistent with the experimental results presented in the main text. The heatmaps demonstrate that MLP modules play a central role in factual knowledge recall at the middle layers, while Attn modules contribute most prominently in the earlier layers. This evidence further supports our main conclusion that both MLP and Attn modules are critical for factual memory storage and retrieval.

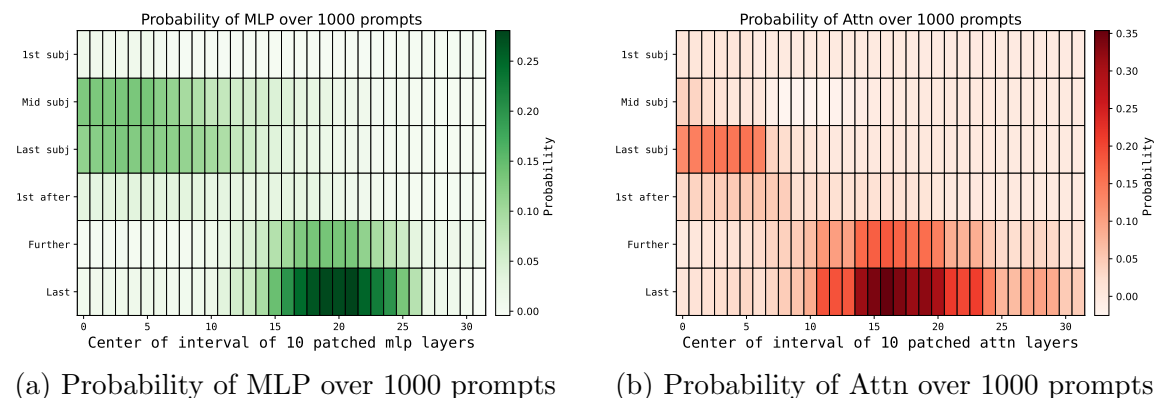

Figure 1: Heatmaps of causal influence from MLP and Attn layers on factual recall in Mistral-7B.

Figure 2 shows the layerwise causal effects of Attn and MLP modules at the last subject token position in Mistral-7B. The logit difference and probability metrics consistently indicate that the Attn module exerts its strongest causal influence in the earliest layers (roughly layers 1–5), after which its effect rapidly decreases to near zero. These results further support the conclusion that Attn modules are most critical for factual recall at the initial stages of processing, while MLP modules play a more prominent role in deeper layers.

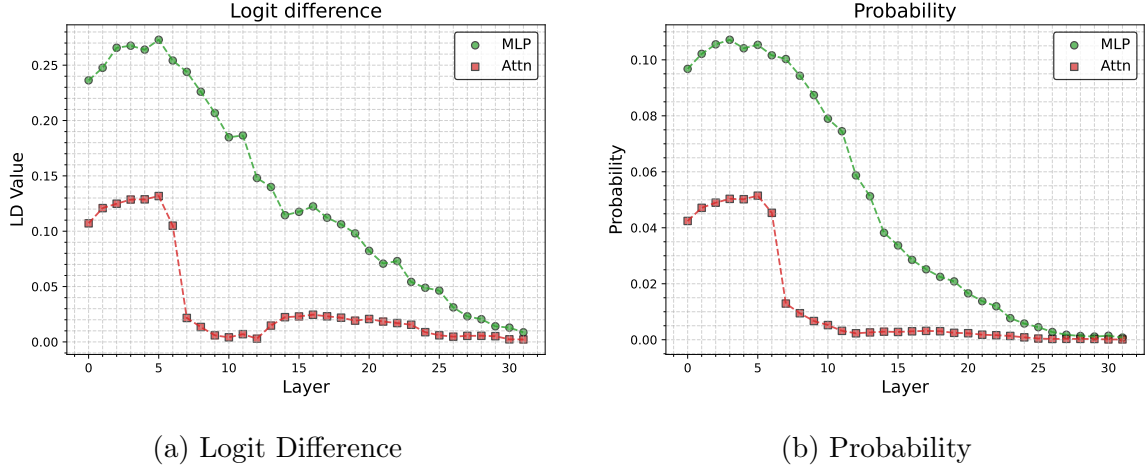

Figure 2: Layerwise Causal Effects of Attn and MLP at the Last Subject Token.

## Appendix B. More Experimental Details

### B.1. Detailed Metric Values for Knowledge Balancing Strategy

We provide detailed evaluation results of the knowledge balancing strategy on the ZsRE benchmark, reporting the full metric values for both Mistral-7B and Qwen2.5-7B under different balance factors  $\alpha$ .

Table 1: Performance metrics for Mistral-7B on ZsRE across different  $\alpha$  values.

| $\alpha$    | 0.00   | 0.06   | 0.08   | <b>0.10</b>   | 0.12   | 0.16   | 0.18   | 0.20   | 0.22   | 0.24   | 0.26   | 0.28   | 0.30   | 0.40   | 0.50   | 0.60   | 0.70   | 0.80   | 0.90   | 1.00   |
|-------------|--------|--------|--------|---------------|--------|--------|--------|--------|--------|--------|--------|--------|--------|--------|--------|--------|--------|--------|--------|--------|
| Edit Succ.  | 91.66  | 92.80  | 92.74  | <b>92.70</b>  | 92.95  | 92.84  | 92.64  | 92.04  | 92.17  | 91.66  | 91.00  | 90.37  | 89.10  | 80.54  | 66.31  | 55.83  | 47.55  | 44.11  | 41.57  | 39.19  |
| Portability | 55.71  | 55.45  | 55.56  | <b>56.25</b>  | 55.72  | 55.52  | 55.36  | 55.11  | 54.98  | 54.96  | 54.58  | 54.31  | 55.13  | 53.04  | 52.26  | 51.71  | 50.82  | 49.62  | 49.03  | 48.39  |
| Locality    | 33.88  | 34.74  | 35.05  | <b>34.88</b>  | 35.48  | 36.04  | 36.32  | 36.33  | 36.62  | 36.91  | 37.12  | 37.43  | 38.37  | 39.32  | 41.95  | 43.80  | 44.69  | 45.13  | 45.26  | 44.82  |
| Fluency     | 564.61 | 565.62 | 565.93 | <b>568.08</b> | 566.85 | 567.56 | 570.62 | 570.06 | 568.04 | 569.33 | 574.33 | 574.30 | 569.28 | 574.72 | 575.36 | 574.82 | 572.80 | 574.13 | 573.68 | 575.49 |

Table 2: Performance metrics for Qwen2.5-7B on ZsRE across different  $\alpha$  values.

| $\alpha$    | 0.00   | 0.10   | 0.12   | 0.14   | 0.16   | 0.18   | 0.20   | 0.22   | 0.24   | 0.26   | <b>0.30</b>   | 0.32   | 0.34   | 0.36   | 0.38   | 0.40   | 0.50   | 0.60   | 0.70   | 0.80   | 0.90   | 1.00   |
|-------------|--------|--------|--------|--------|--------|--------|--------|--------|--------|--------|---------------|--------|--------|--------|--------|--------|--------|--------|--------|--------|--------|--------|
| Edit Succ.  | 95.43  | 96.65  | 96.95  | 97.13  | 97.29  | 97.65  | 97.79  | 97.18  | 97.06  | 96.94  | <b>96.98</b>  | 96.25  | 95.42  | 94.74  | 94.04  | 93.07  | 84.96  | 70.32  | 54.85  | 44.97  | 39.53  | 36.63  |
| Portability | 53.88  | 53.77  | 53.98  | 54.12  | 54.05  | 54.10  | 54.06  | 53.96  | 53.81  | 53.84  | <b>53.90</b>  | 53.81  | 53.61  | 53.62  | 53.83  | 54.04  | 53.38  | 51.47  | 49.60  | 48.27  | 47.32  | 45.64  |
| Locality    | 32.58  | 33.78  | 33.87  | 33.87  | 34.04  | 33.98  | 34.01  | 34.32  | 34.48  | 34.65  | <b>34.92</b>  | 35.15  | 35.15  | 35.47  | 36.19  | 36.46  | 37.93  | 38.44  | 38.92  | 38.80  | 38.16  | 37.48  |
| Fluency     | 569.84 | 572.18 | 574.87 | 575.23 | 571.93 | 573.06 | 574.23 | 572.00 | 571.59 | 573.98 | <b>572.77</b> | 573.85 | 572.51 | 576.27 | 576.94 | 575.00 | 580.49 | 583.12 | 590.12 | 594.30 | 598.59 | 598.27 |

**Discussion:** The tables above report the raw metric values for Edit Success, Portability, Locality, and Fluency as the balance factor  $\alpha$  varies. We observe that moderate values of

$\alpha$  consistently provide the best balance between factual editing accuracy and knowledge retention.

### B.2. Attn-only vs MLP-only vs Joint (IntAttn-Edit) Ablation

We instantiate Attn-only ( $\alpha = 1$ ) and MLP-only ( $\alpha = 0$ ) as special cases of our framework. Joint editing uses the  $\alpha$  determined by our knowledge-balancing strategy.

Table 3: Attn-only vs MLP-only vs Joint (IntAttn-Edit) on ZsRE. Joint editing balances strengths from both modules.

| Model        | Method                     | Edit Success | Portability  | Locality     | Fluency       |
|--------------|----------------------------|--------------|--------------|--------------|---------------|
| 3*Qwen2.5-7B | MLP-only ( $\alpha = 0$ )  | 95.43        | 53.88        | 32.58        | 569.84        |
|              | Attn-only ( $\alpha = 1$ ) | 36.64        | 45.64        | <b>37.48</b> | <b>598.27</b> |
|              | <i>IntAttn-Edit</i>        | <b>96.98</b> | <b>55.04</b> | 34.40        | 572.78        |
| 3*Mistral-7B | MLP-only ( $\alpha = 0$ )  | 91.66        | 55.71        | 33.88        | 564.61        |
|              | Attn-only ( $\alpha = 1$ ) | 39.19        | 48.39        | <b>44.82</b> | <b>575.49</b> |
|              | <i>IntAttn-Edit</i>        | <b>92.70</b> | <b>56.25</b> | 34.88        | 568.08        |

**Takeaway.** MLP updates contribute more to *Edit Success* and *Portability*, whereas Attn updates favor *Locality* and *Fluency*. The knowledge-balancing strategy integrates these complementary strengths, yielding a strong overall trade-off.

### B.3. Cross-framework generality: IntAttn-Edit for ROME

To assess generality across editing paradigms, we port our method to **ROME** while preserving its *single-layer* localization and linearized solve. The port converts ROME into a *dual-path* (MLP+Attn) edit guided by the same balance principle ( $\alpha$ ), with the rest of the framework unchanged.

Table 4: ZsRE results for ROME vs. IntAttn-Edit for ROME. The joint update yields consistent gains without fluency degradation.

| Dataset | Metric       | ROME   | IntAttn-Edit for ROME |
|---------|--------------|--------|-----------------------|
| 4*ZsRE  | Edit Success | 79.06  | <b>89.56</b>          |
|         | Portability  | 39.37  | <b>48.07</b>          |
|         | Locality     | 19.06  | <b>24.99</b>          |
|         | Fluency      | 561.96 | <b>568.33</b>         |

**Gains.** Absolute: +10.50 (Edit), +8.70 (Port), +5.93 (Loc), +6.37 (Flu). Relative: +13.28% (Edit), +22.10% (Port), +31.11% (Loc); Fluency +1.13%. Without altering ROME’s single-layer paradigm, the  $\alpha$ -guided joint update yields simultaneous improvements in *Edit Success*, *Portability*, and *Locality*, with no fluency degradation—supporting generality across *backbones* (Mistral/Qwen) and *editing frameworks* (ROME  $\rightarrow$  IntAttn-Edit for ROME).

#### B.4. General Capabilities After Editing (GSM8K 2-shot)

To evaluate preservation of overall capabilities after knowledge editing, we report **GSM8K (2-shot)** results after performing **100 edits**.

Table 5: General capabilities after editing on GSM8K (2-shot). IntAttn-Edit achieves high edit success with minimal impact on general capabilities; no evidence of catastrophic forgetting.

| Model        | Metric | Before Edit | IntAttn-Edit | MEMIT | ROME    | R-ROME  | AlphaEdit |
|--------------|--------|-------------|--------------|-------|---------|---------|-----------|
| 2*Qwen2.5-7B | ACC    | 65.88       | <b>65.81</b> | 67.10 | 60.05   | 60.28   | 65.47     |
|              | PPL    | 3.06        | <b>3.12</b>  | 3.10  | 3.19    | 3.20    | 3.13      |
| 2*Mistral-7B | ACC    | 28.35       | <b>27.37</b> | 28.89 | 0.00    | 0.00    | 25.74     |
|              | PPL    | 3.15        | <b>3.17</b>  | 3.16  | 3868.80 | 6948.70 | 3.41      |

**Conclusion.** IntAttn-Edit maintains general capabilities while achieving high edit success, with *no evidence of catastrophic forgetting*
